# Supplementary material
Source: Springer Nature journal article supplement (https://www.springermedizin.de/resource/supplementary/12885_2012_3710_MOESM3_ESM.pdf/9465958)
Supplement: MOESM3 [file 9465958]

**A**

PBMC

#1 #2 #3

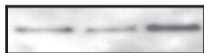

E-cadherin

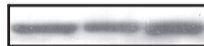

Actin

**B**-- 1.0 $\mu$ M MS-275

CLL #1

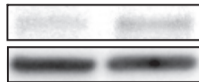

E-cadherin

Actin

CLL #2

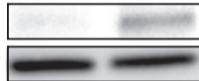

E-cadherin

Actin

CLL #3

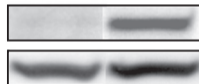

E-cadherin

Actin

CLL #4

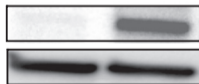

E-cadherin

Actin

CLL #5

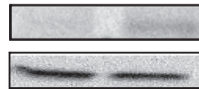

E-cadherin

Actin
